# Supplementary material for: Polysome-Associated lncRNAs during Cardiomyogenesis of hESCs
Source: Preprints.org preprint supplement (doi:10.20944/preprints201903.0157.v1), 2019-03-15
Supplement: Supplementary file 1 [file supplementary]

Table S1. Pathway analysis of the lncRNAs in each RNA fraction. The ribosome-free fraction is on top with the name of the enriched pathway term in the first column, the source from which the information was taken in the second column, FDR in the third column, the number of genes from the input found in the database in the fourth column, and the genes name in the fifth column. The polysome-bound fraction is shown on the bottom.

| RIBOSOME-FREE RNA | | | | |
| --- | --- | --- | --- | --- |
| Name | Source | FDR | #genes | Gene |
| dermatan sulfate biosynthesis (late stages) | [BIOCYC](http://www.ncbi.nlm.nih.gov/biosystems/545277) | 0,015 | [1](https://toppgene.cchmc.org/showQueryTerms.jsp?userdata_id=25bb57dc-9ef3-42ce-9abd-cbfe41ef2656&feature=pt&row=0) | DSE |
| Dermatan sulfate biosynthesis | [REACTOME](http://www.ncbi.nlm.nih.gov/biosystems/1269986) | 0,015 | [1](https://toppgene.cchmc.org/showQueryTerms.jsp?userdata_id=25bb57dc-9ef3-42ce-9abd-cbfe41ef2656&feature=pt&row=1) | DSE |
| dermatan sulfate biosynthesis | [BIOCYC](http://www.ncbi.nlm.nih.gov/biosystems/545280) | 0,015 | [1](https://toppgene.cchmc.org/showQueryTerms.jsp?userdata_id=25bb57dc-9ef3-42ce-9abd-cbfe41ef2656&feature=pt&row=2) | DSE |
| Digestion of dietary lipid | [REACTOME](http://www.ncbi.nlm.nih.gov/biosystems/1270003) | 0,015 | [1](https://toppgene.cchmc.org/showQueryTerms.jsp?userdata_id=25bb57dc-9ef3-42ce-9abd-cbfe41ef2656&feature=pt&row=3) | LMF1 |
| Glycosaminoglycan biosynthesis - chondroitin sulfate / dermatan sulfate | [KEGG](http://www.ncbi.nlm.nih.gov/biosystems/82982) | 0,015 | [1](https://toppgene.cchmc.org/showQueryTerms.jsp?userdata_id=25bb57dc-9ef3-42ce-9abd-cbfe41ef2656&feature=pt&row=4) | DSE |
| Chondroitin sulfate/dermatan sulfate metabolism | [REACTOME](http://www.ncbi.nlm.nih.gov/biosystems/1269984) | 0,033 | [1](https://toppgene.cchmc.org/showQueryTerms.jsp?userdata_id=25bb57dc-9ef3-42ce-9abd-cbfe41ef2656&feature=pt&row=5) | DSE |
| POLYSOME-BOUND RNA | | | | |
| Digestion of dietary lipid | REACTOME | 0,022 | 1 | LMF1 |
| Heterotrimeric G-protein signaling pathway-Gq alpha and Go alpha mediated pathway | PantherDB | 0,048 | 1 | RGS5 |
| Lipid digestion, mobilization, and transport | REACTOME | 0,048 | 1 | LMF1 |
| Heterotrimeric G-protein signaling pathway-Gi alpha and Gs alpha mediated pathway | PantherDB | 0,048 | 1 | RGS5 |
