# Supplementary figures and images for: Polysome-Associated lncRNAs during Cardiomyogenesis of hESCs
Source: Preprints.org preprint supplement (doi:10.20944/preprints201903.0157.v1), 2019-03-15

**cluster 1**

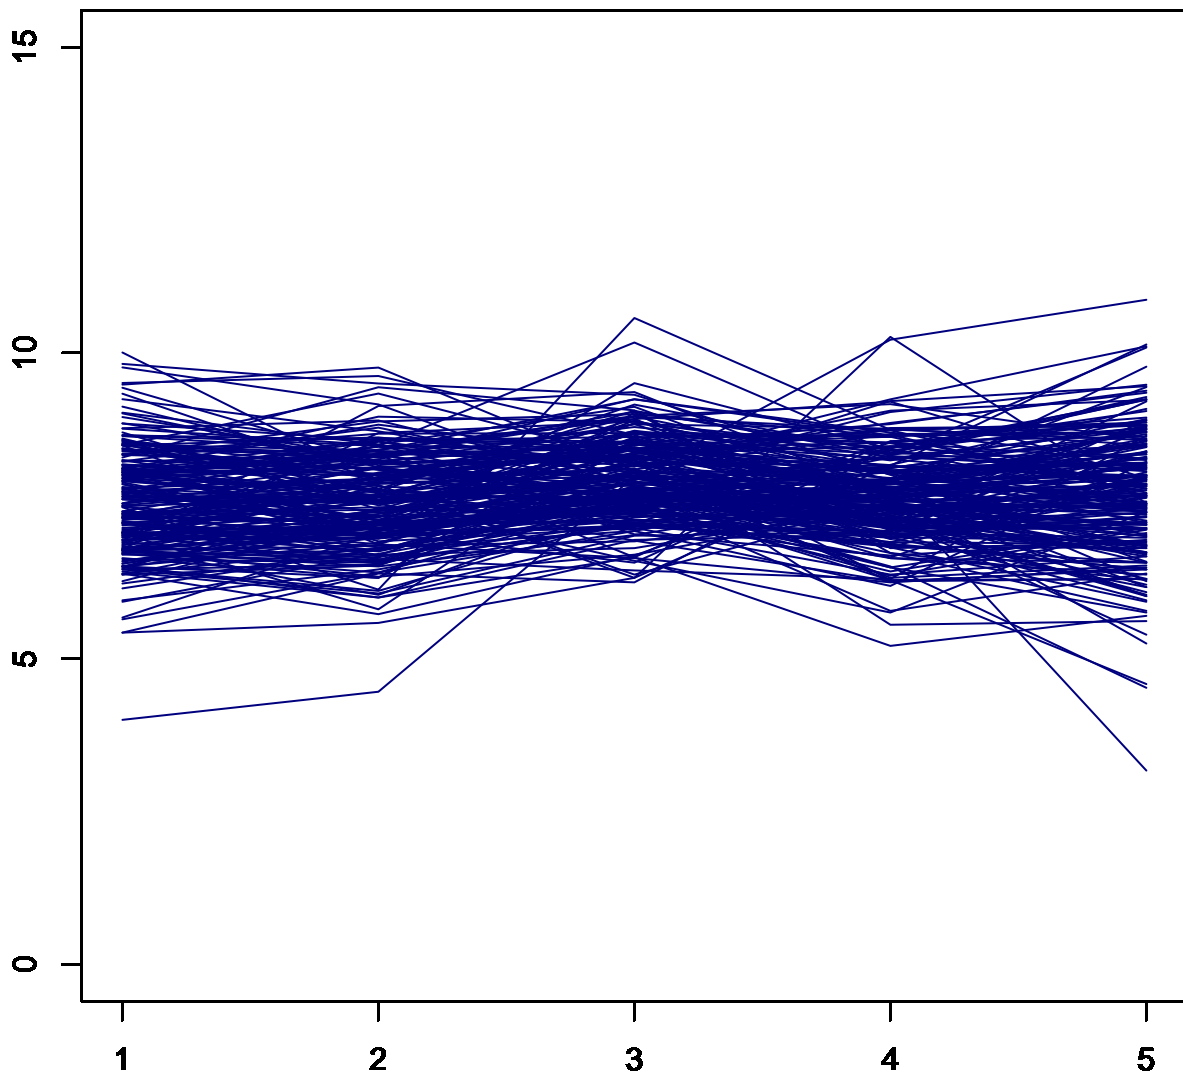

**cluster 2**

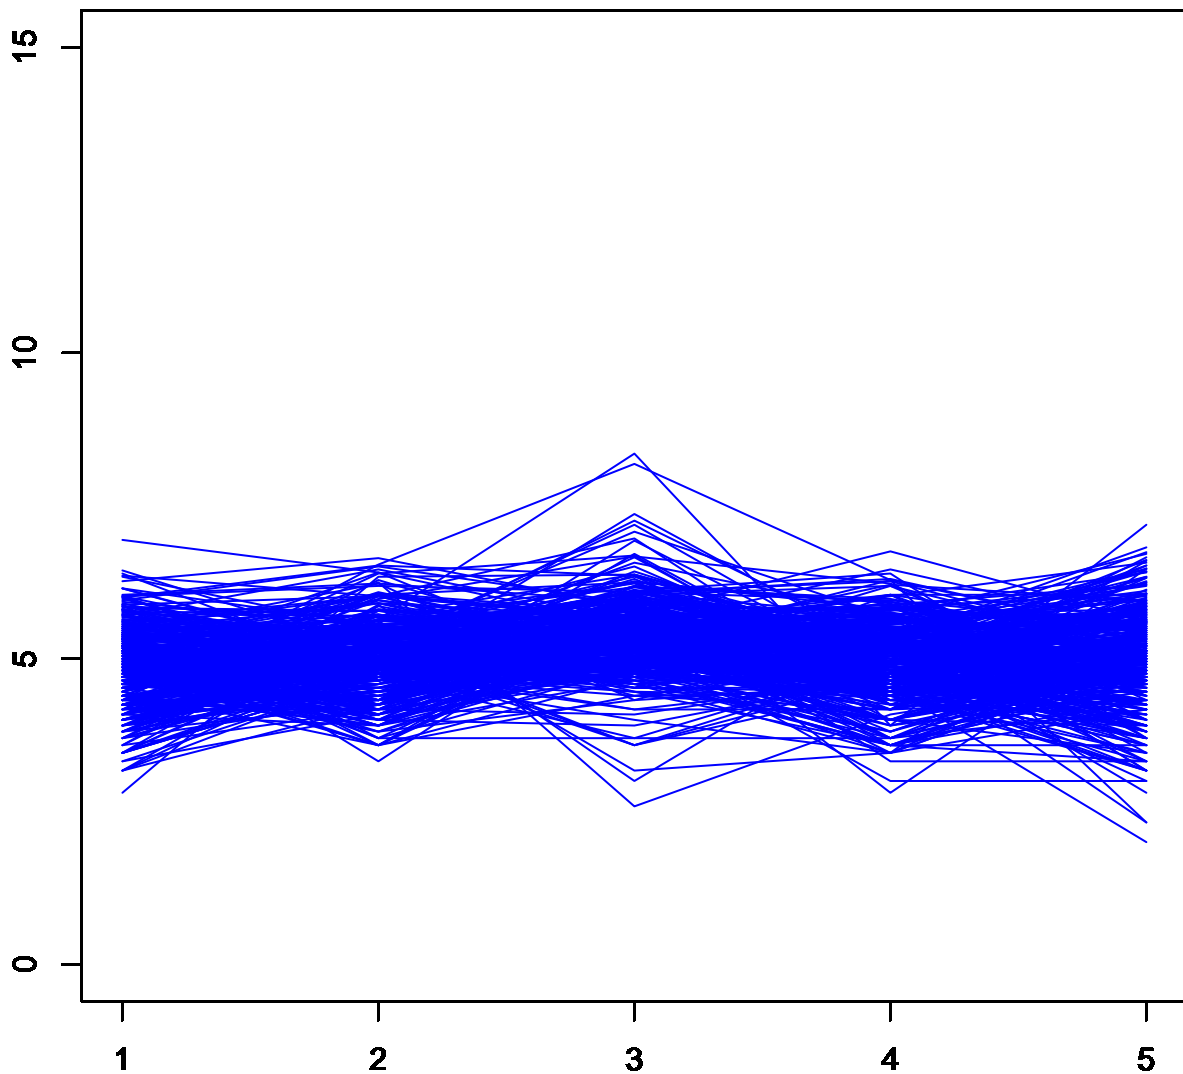

**cluster 3**

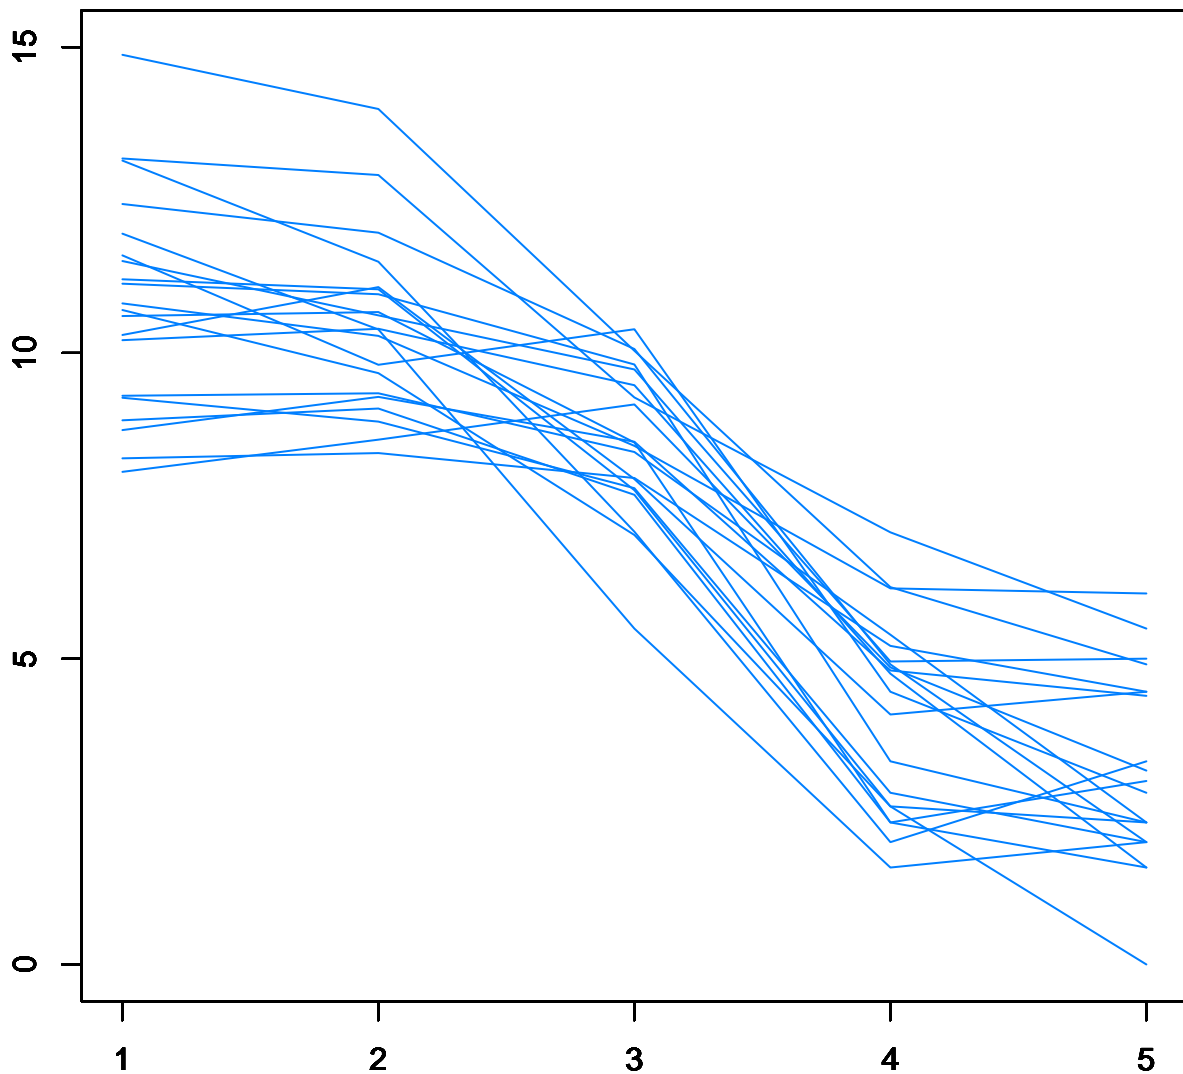

**cluster 4**

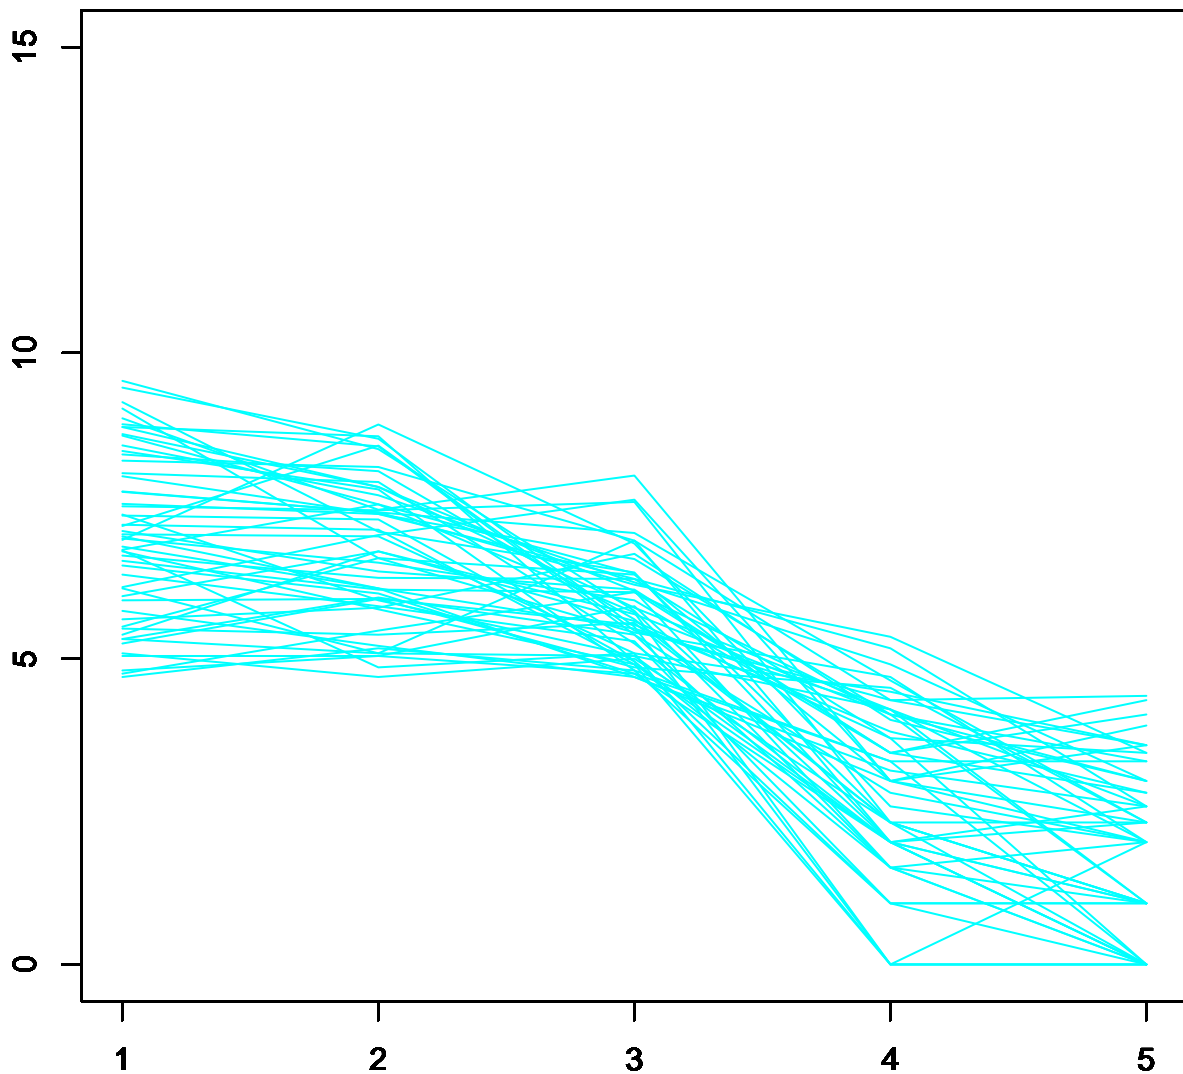

**cluster 5**

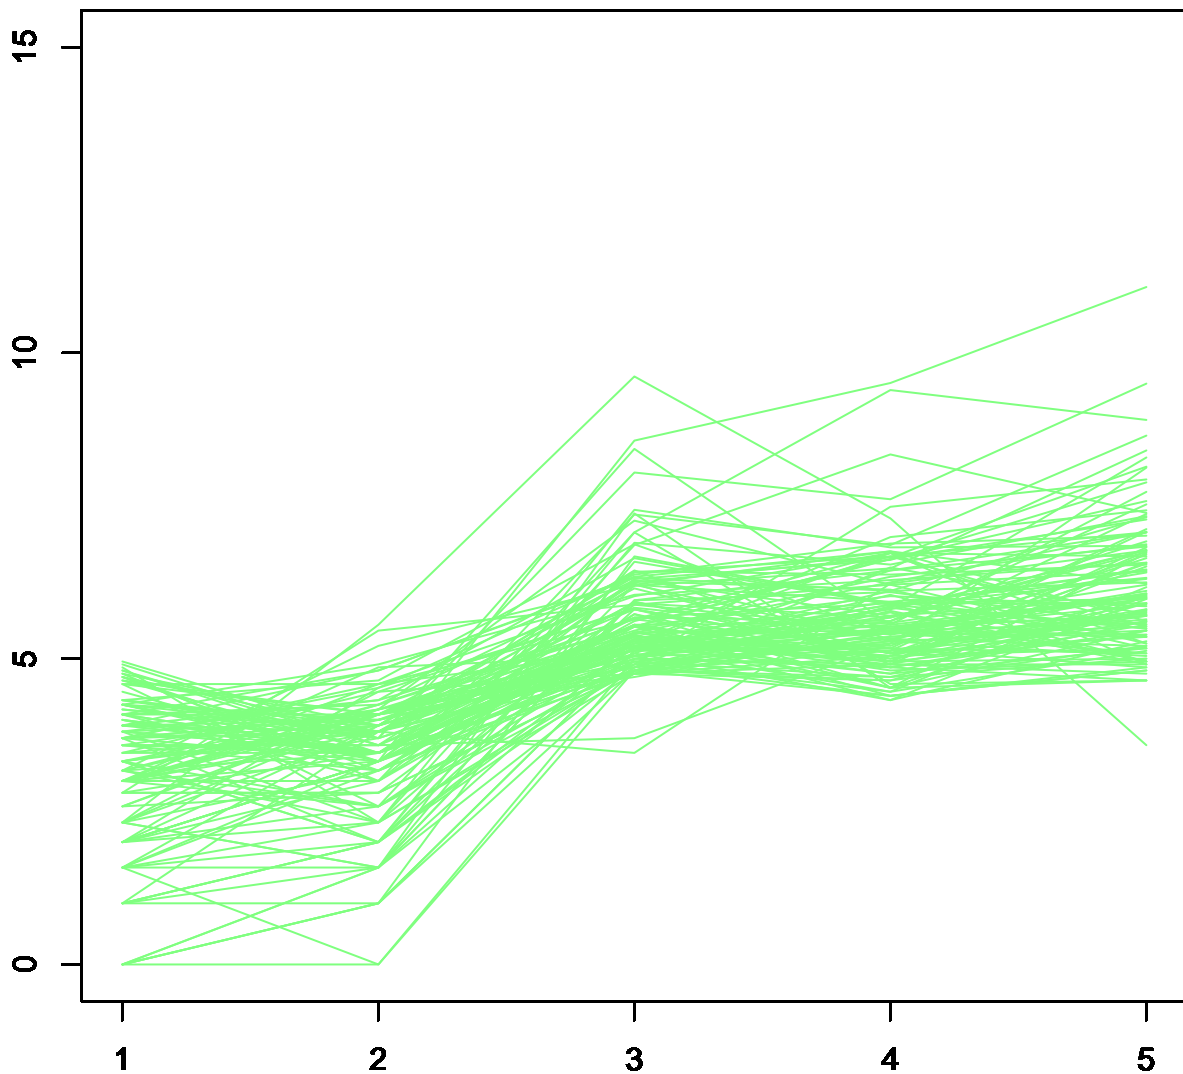

**cluster 6**

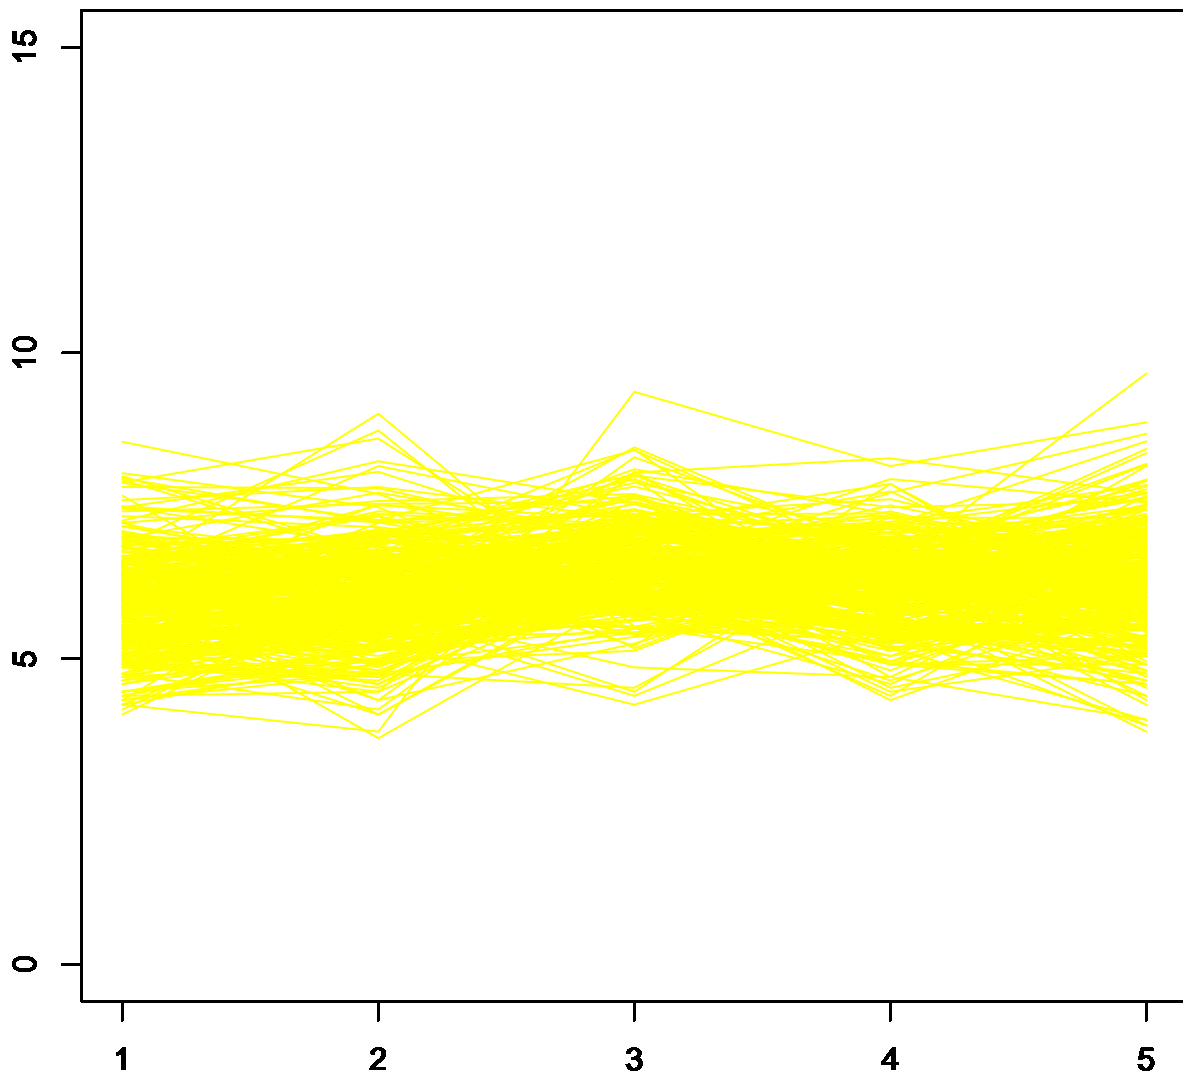

**cluster 7**

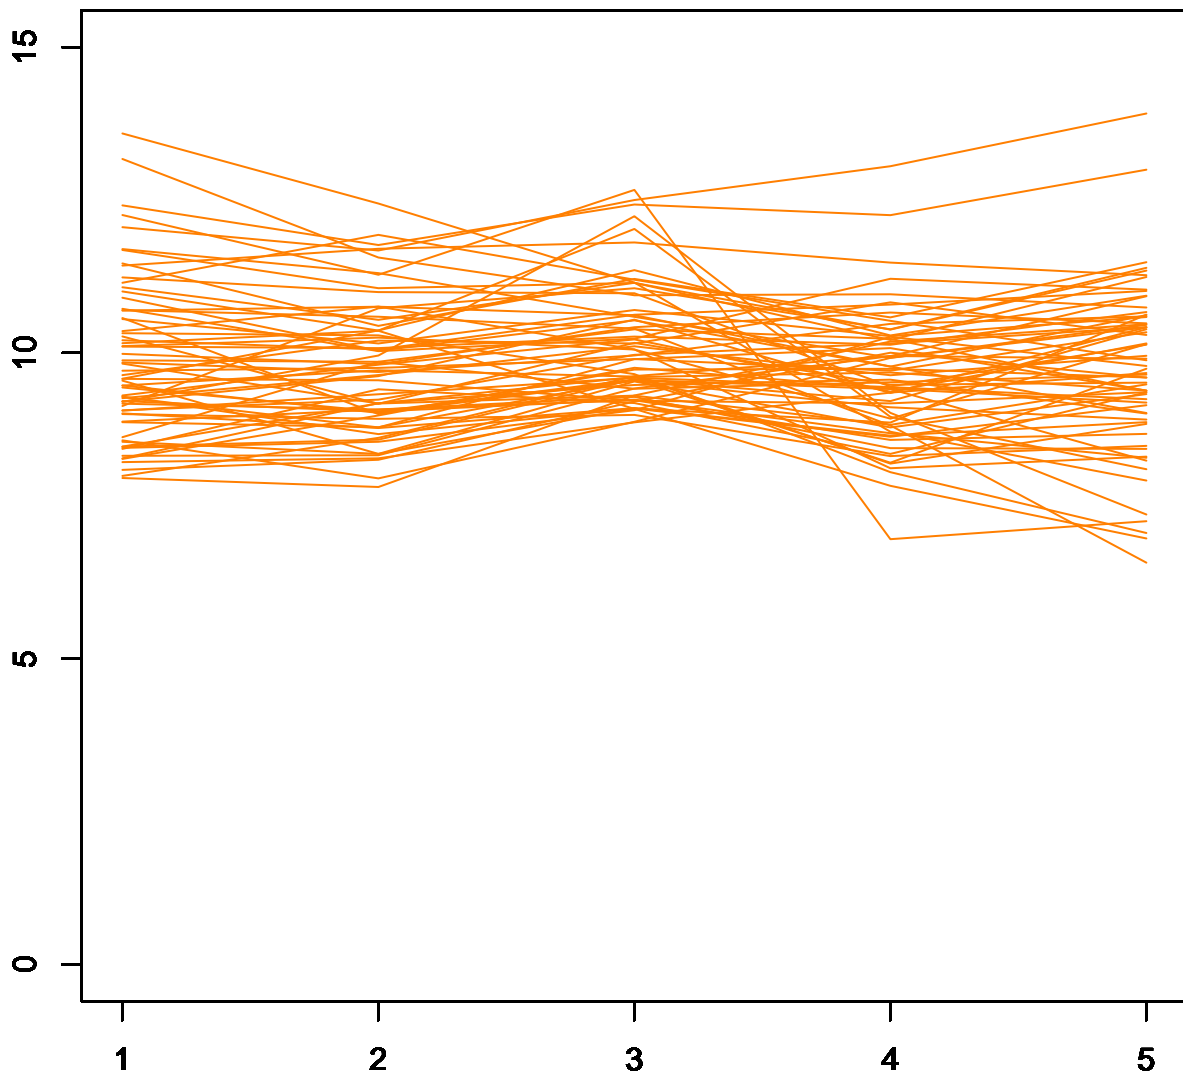

Supplement: Supplementary file 1 [file supplementary]

**cluster 1**

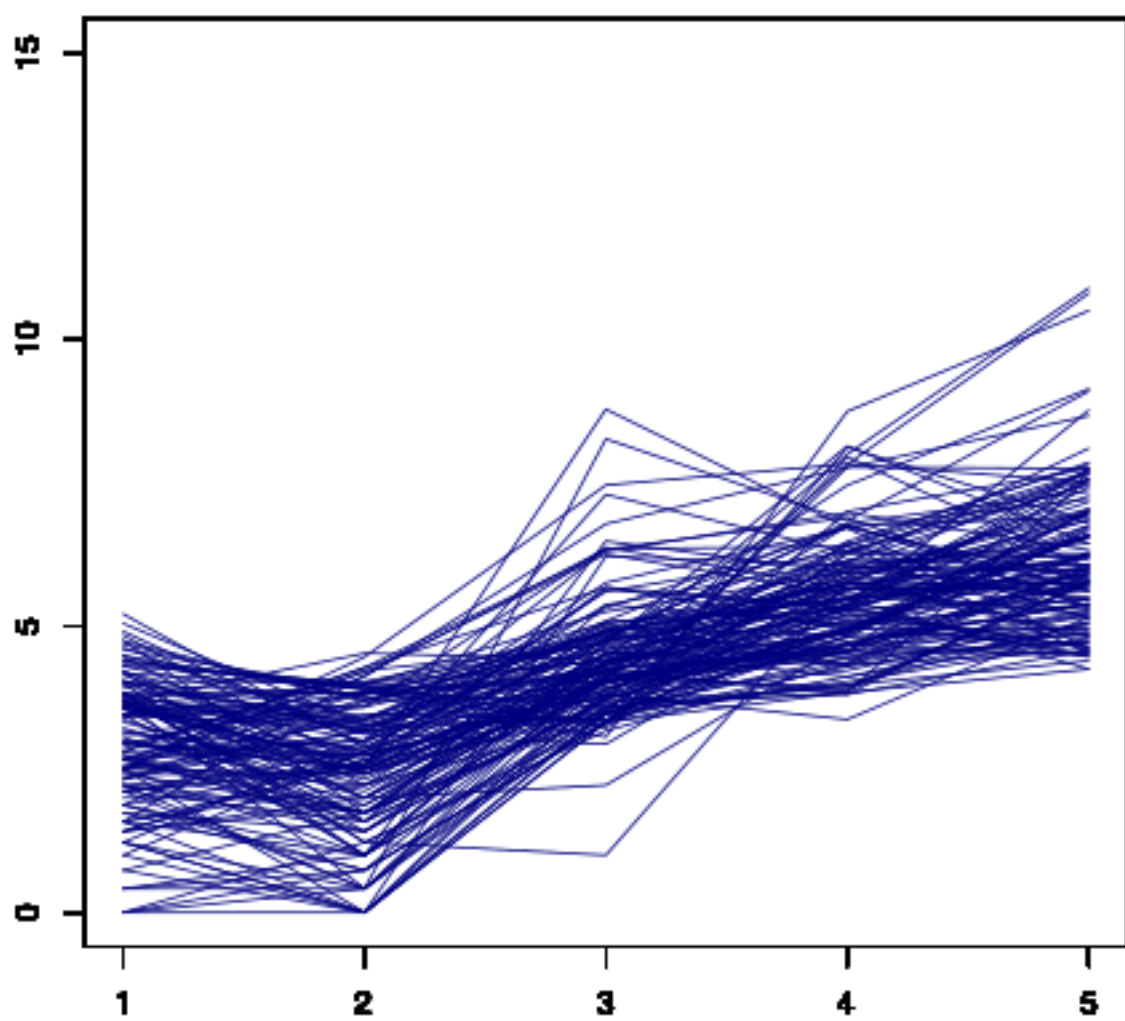

**cluster 2**

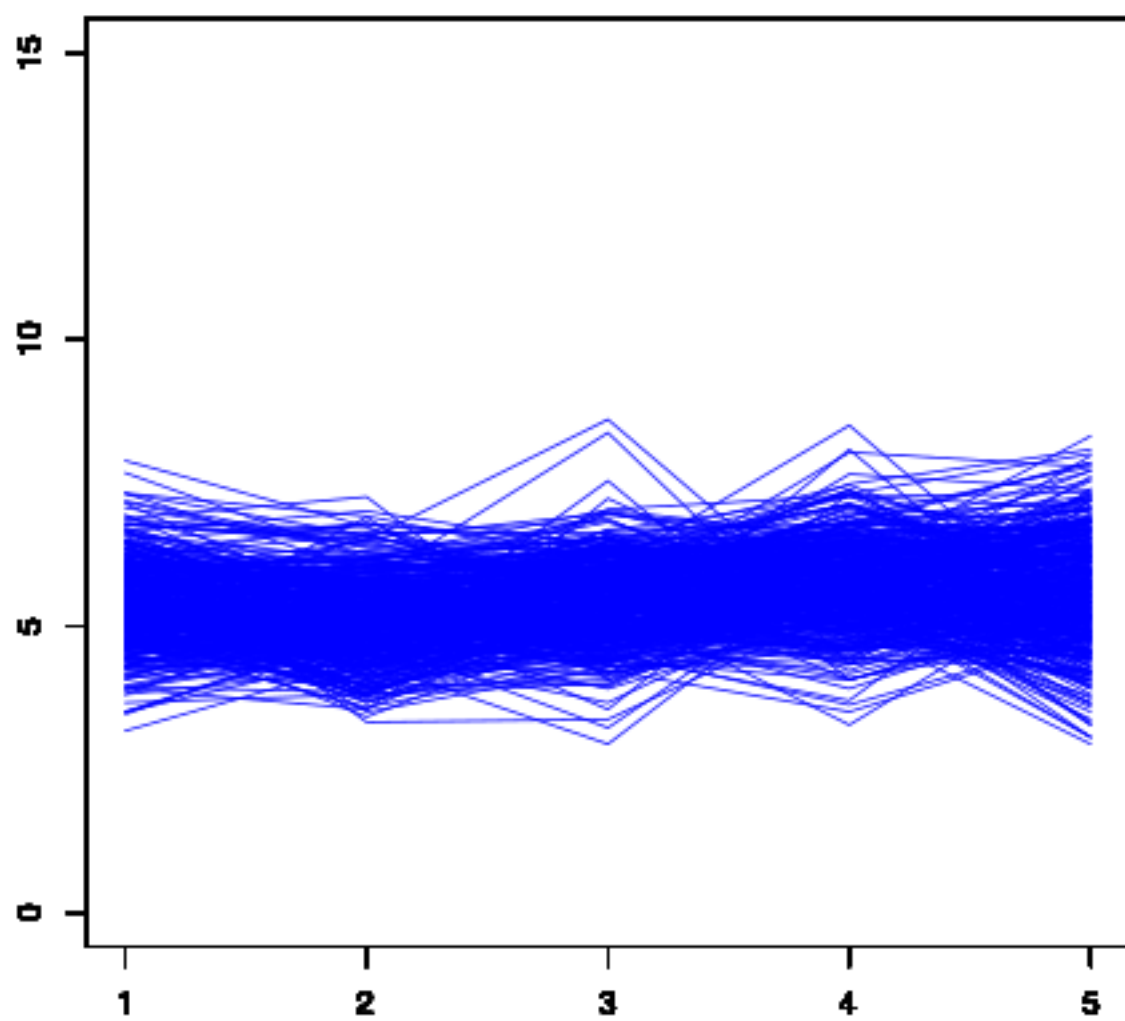

**cluster 3**

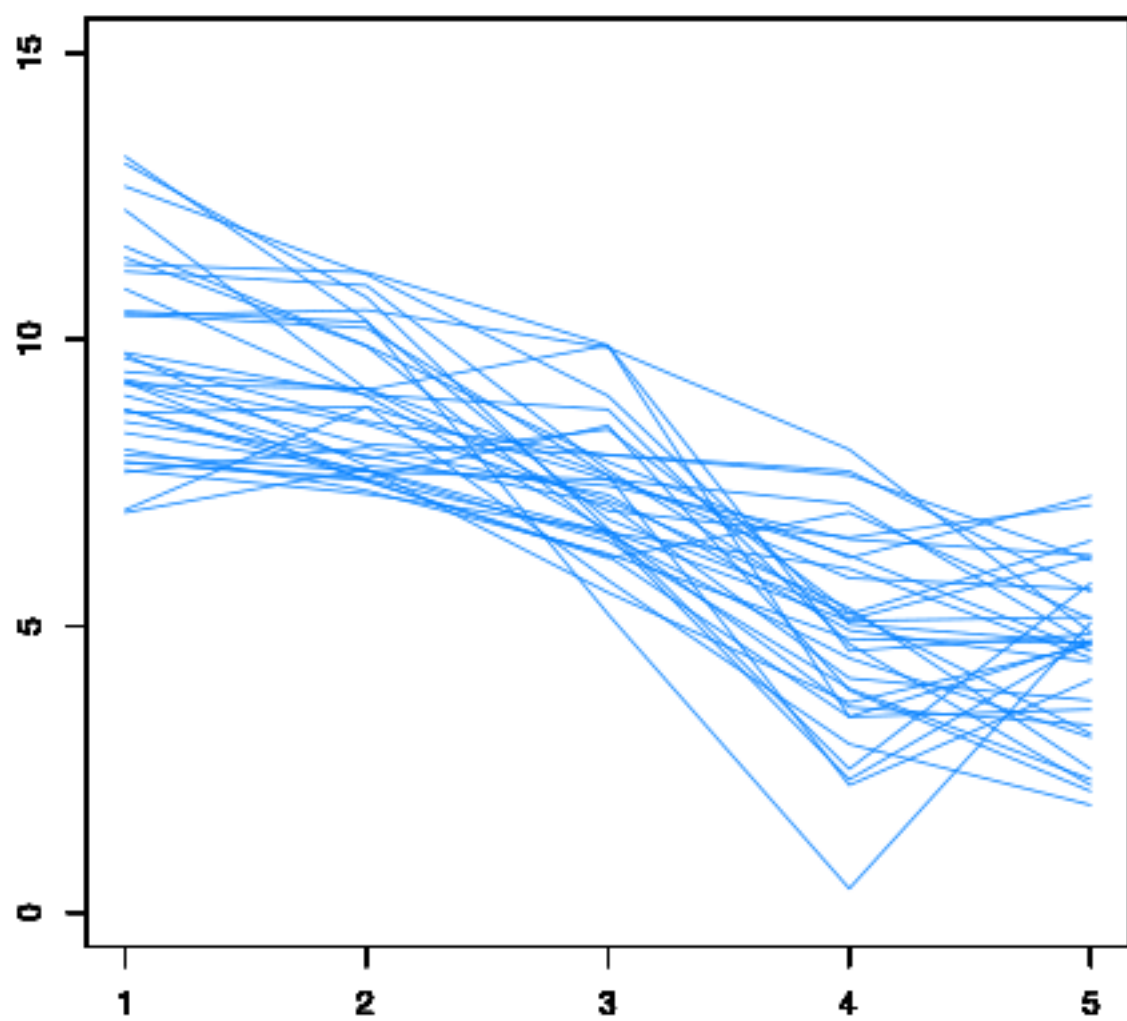

**cluster 4**

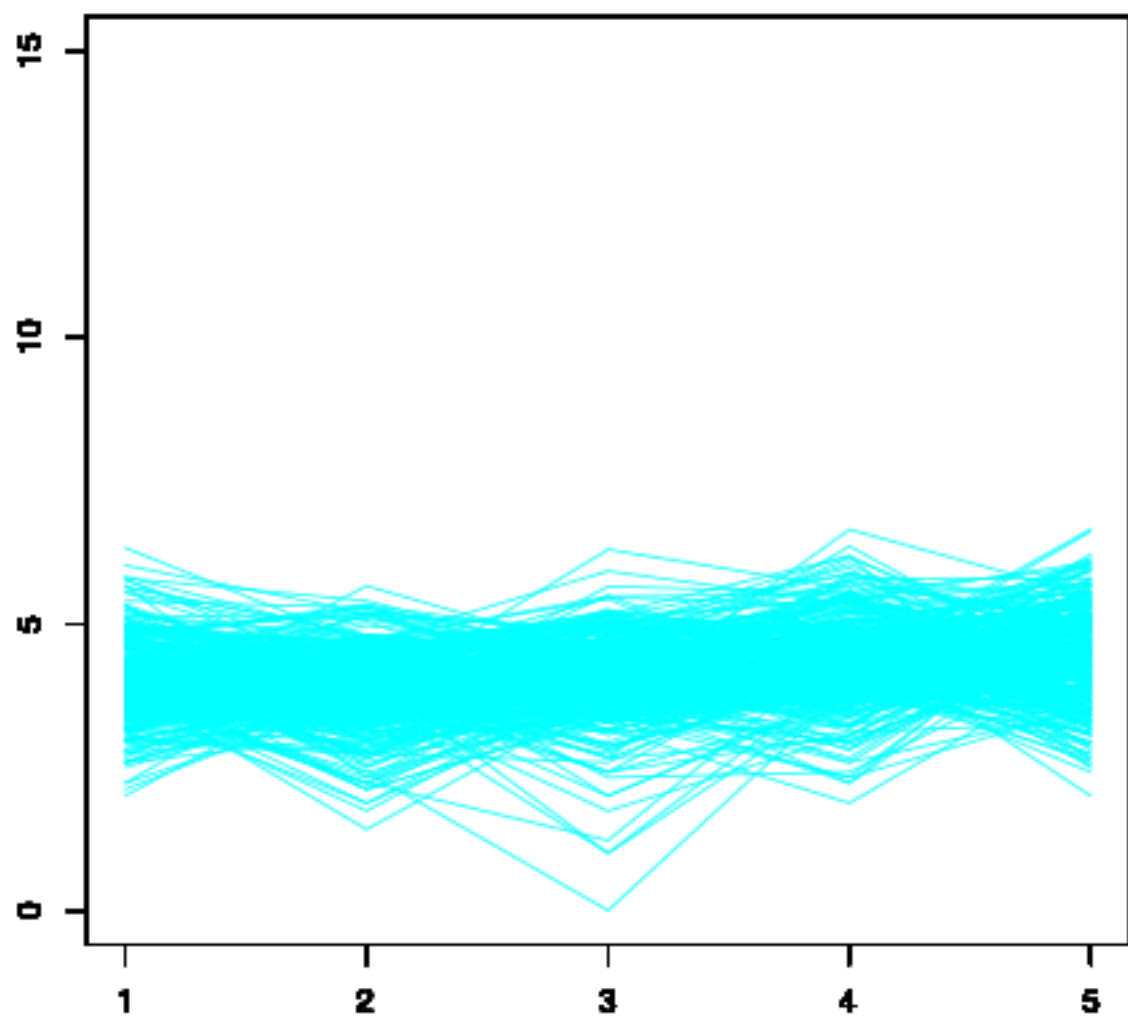

**cluster 5**

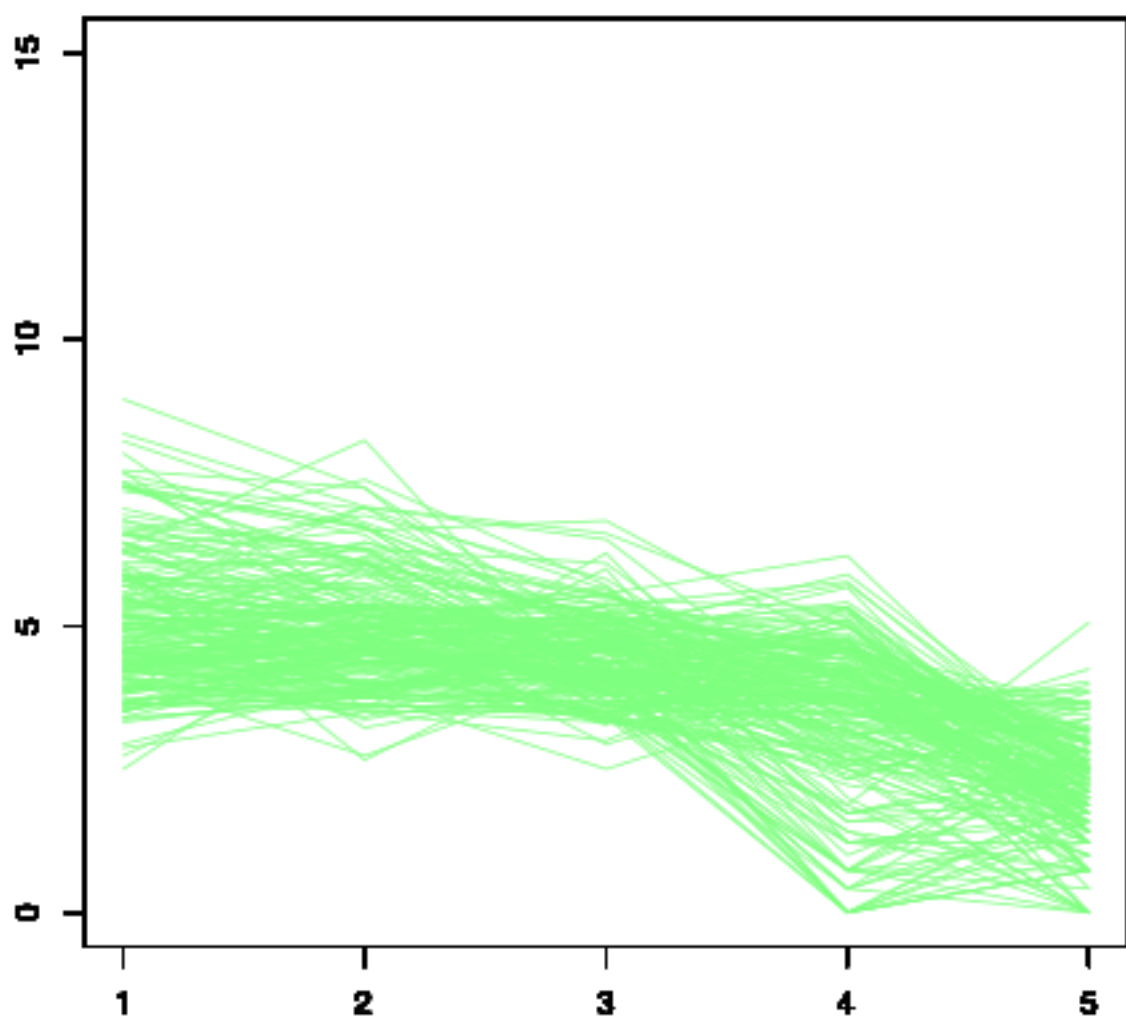

**cluster 6**

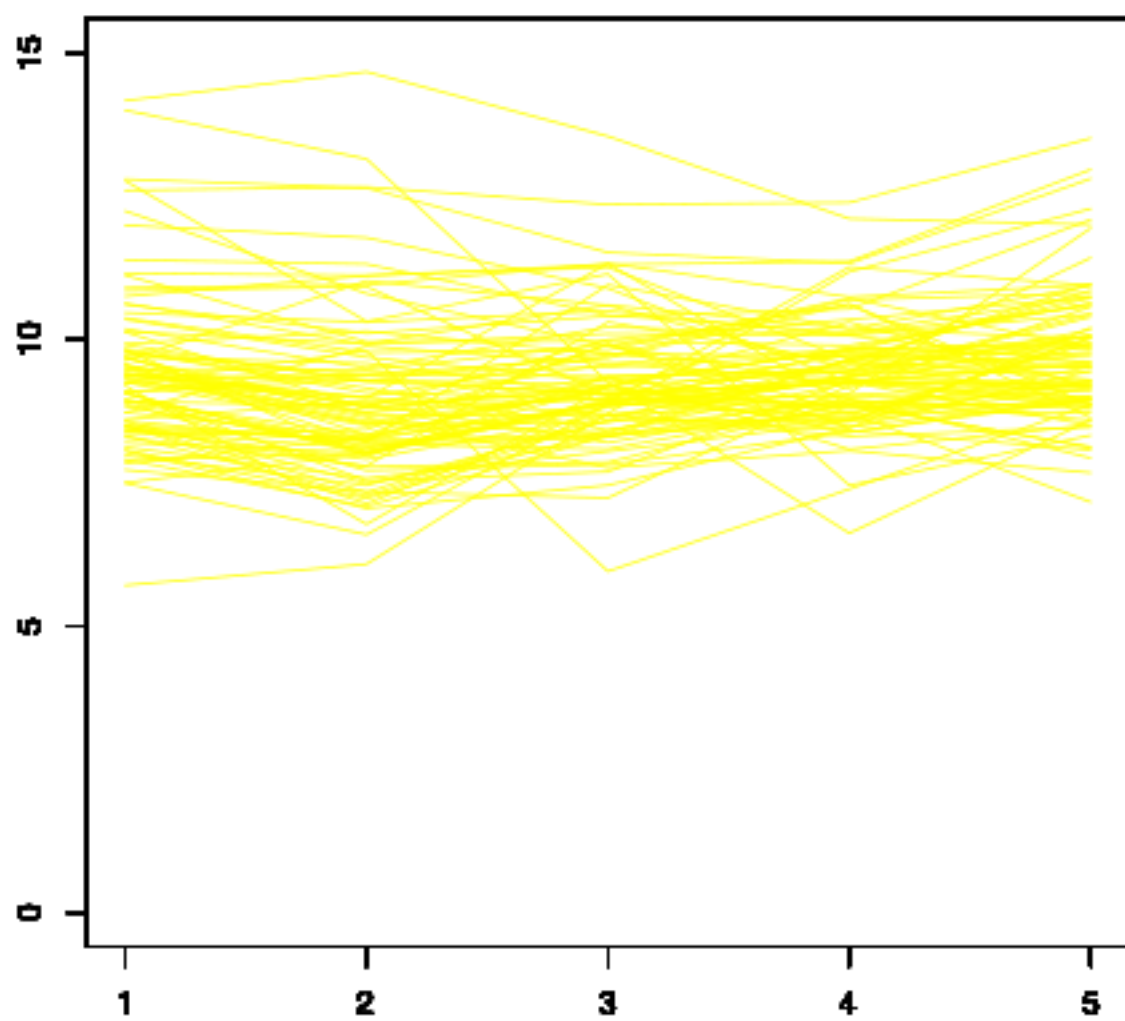

**cluster 7**

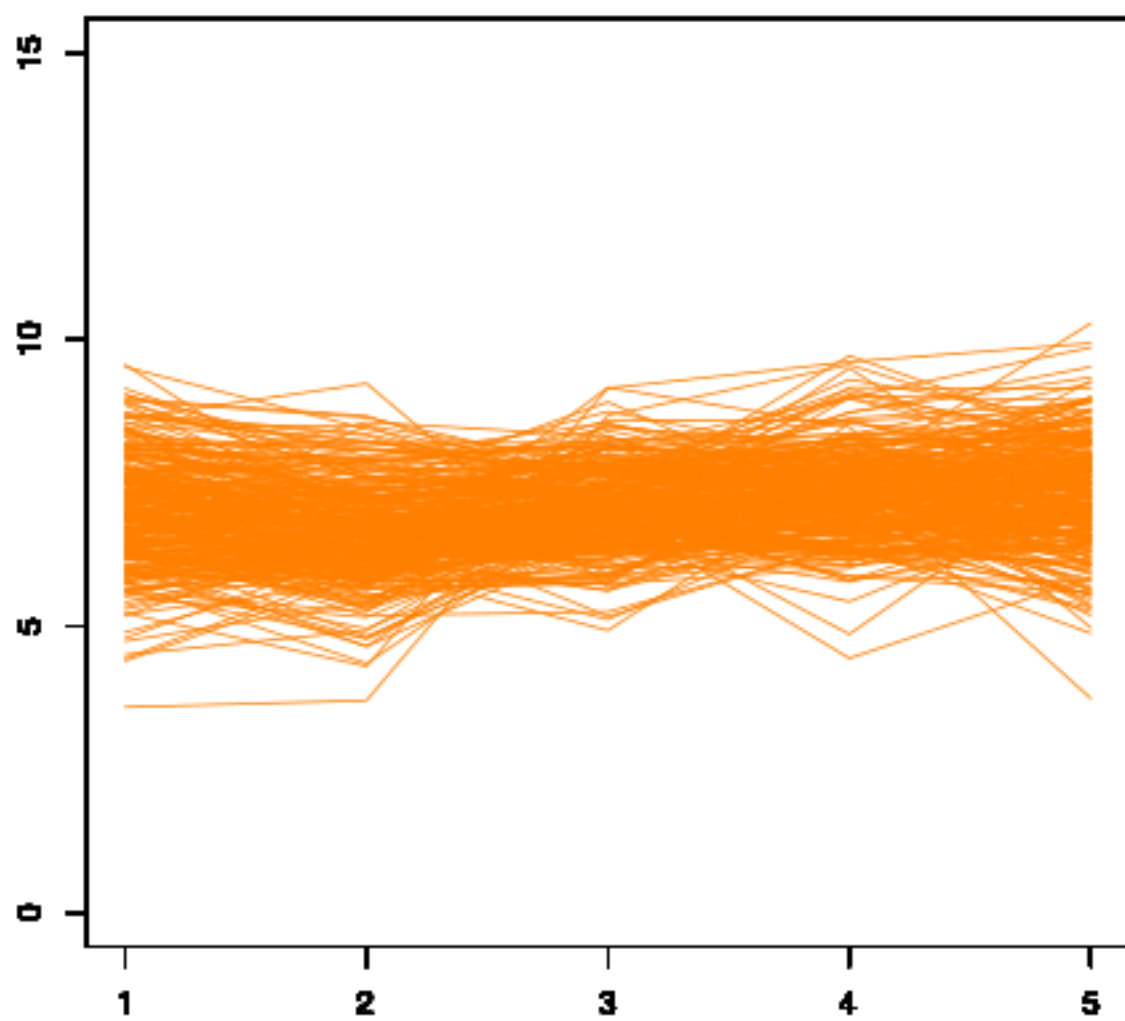

Supplement: Supplementary file 2 [file supplementary]
